# Supplementary material for: Laminar-specific control of response gain and orientation-tuning by parvalbumin-expressing inhibitory interneurons in primate visual cortex
Source: Research Square preprint supplement (doi:10.21203/rs.3.rs-9117440/v1), 2026-04-10
Supplement: Supplementary file 1 [file 55c80fd58b277495bf88d7cd.pdf]

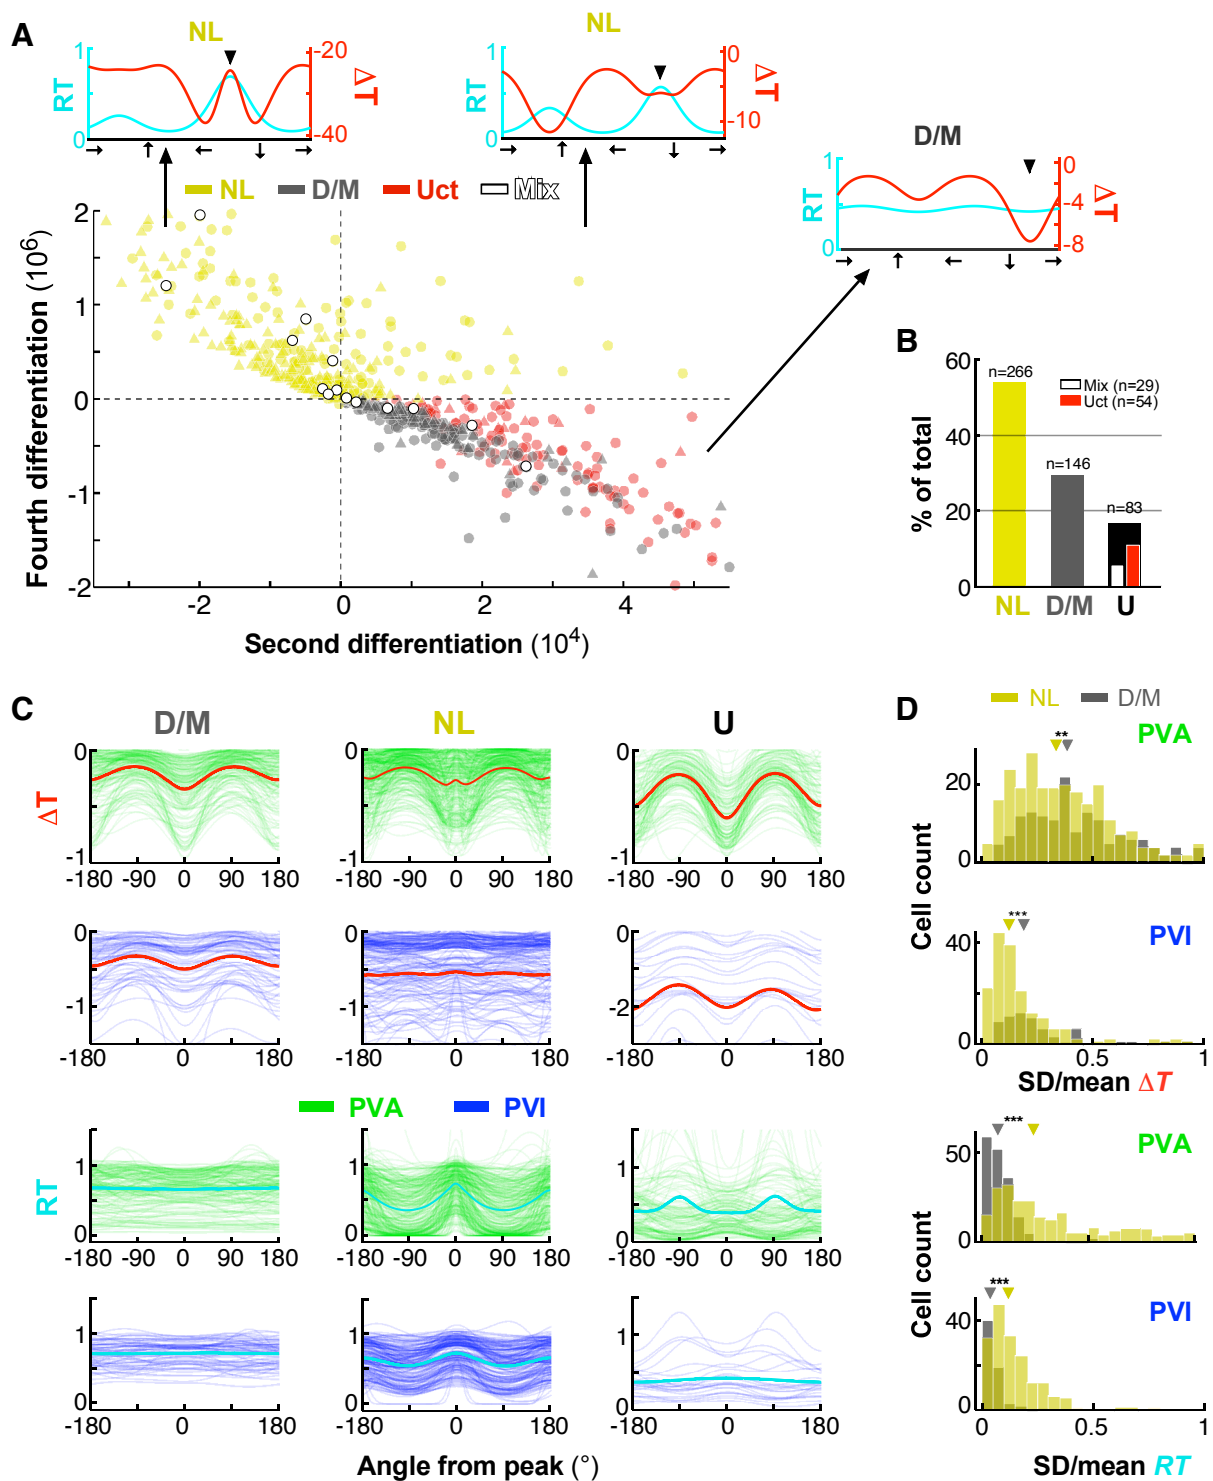

**Extended Data Figure 2**

**Clustering of recorded units.**

(A) Scatter plot of all recorded units in a 2D feature space, where the x-axis represents the second derivative, and the Y-axis the fourth derivative of the  $\Delta T$  curve, computed at the curve's peak (see STAR Methods). *Yellow dots*: units classified as NL; *gray dots*: units classified as linear D/M; *red dots*: uncategorized units (Uct); *white dots*: mixed units (Mix). *Circles and triangles*: units recorded under PVA and PVI experiments, respectively. *Insets*: representative  $\Delta T$  and *RT* curves in each quadrant of the 2D feature space. *Arrowheads* mark the cell's preferred orientation. (B) Percent of units falling into each group. Here each unit recorded at different light intensities is considered a single sample, while in (A) units recorded at different intensities are considered independent samples. Units classified as NL (yellow bar) or D/M (gray bar) showed the same effect at all intensities. Mix unclassified cells (white bar) showed D/M or NL effects at different laser intensities. Black bar: unclassified units that did not fit into any category (Uct). n= number of units in each group. (C) Top two rows:  $\Delta T$  curves (computed from normalized tuning curves) for each individual unit under PVA (top row, green) and PVI (second row, blue) experiments, grouped by effect type (Left: D/M; Middle: NL; Right: U). *Red curves*: population averages. Bottom two rows: Same as Top two rows, but here *RT* curves are shown, instead, and *cyan curves* are population averages. (D) Top two rows: distribution of Coefficient of Variation (CoV=standard deviation/mean) of the  $\Delta T$  curve across the population of NL and D/M units under PVA (top row) and PVI (second row) experiments. Most cells in both populations show large CoV values indicating lack of subtractive/additive effects of  $PV^+$  cell manipulation. Bottom two rows: distribution of CoV of the *RT* curve for the NL and D/M populations under PVA (top row) and PVI (second row). The D/M population shows significantly smaller CoV than the NL population, indicative of D/M effects.
