# Supplementary material for: Laminar-specific control of response gain and orientation-tuning by parvalbumin-expressing inhibitory interneurons in primate visual cortex
Source: Research Square preprint supplement (doi:10.21203/rs.3.rs-9117440/v1), 2026-04-10
Supplement: Supplementary file 2 [file 63f5dfc929dadd48308ecc48.pdf]

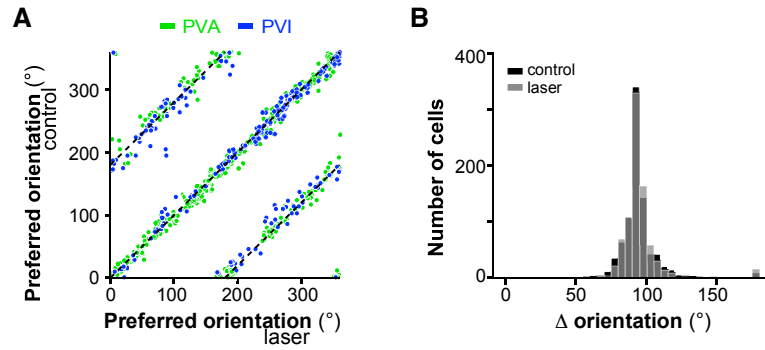

**Extended Data Figure 1**

***PV*<sup>+</sup> interneuron manipulation does not affect the preferred orientation.**

(A) The preferred orientation in the control condition is plotted against the preferred orientation in the laser condition, for cells recorded in PVA (*green*) and PVI (*blue*) experiments. Cells along the diagonal line do not change their preferred orientation. Cells along the lines with slope of 1 switched their preferred direction ( $\pm 180^\circ$ ) but not orientation. (B) Distribution of angular distance between the preferred and non-preferred orientation across the cell population, in the control (*black*) and laser (*gray*) conditions.
