# Supplementary material for: Laminar-specific control of response gain and orientation-tuning by parvalbumin-expressing inhibitory interneurons in primate visual cortex
Source: Research Square preprint supplement (doi:10.21203/rs.3.rs-9117440/v1), 2026-04-10
Supplement: Supplementary file 3 [file 6d90593375cabe4a9de57178.pdf]

## Unclassified

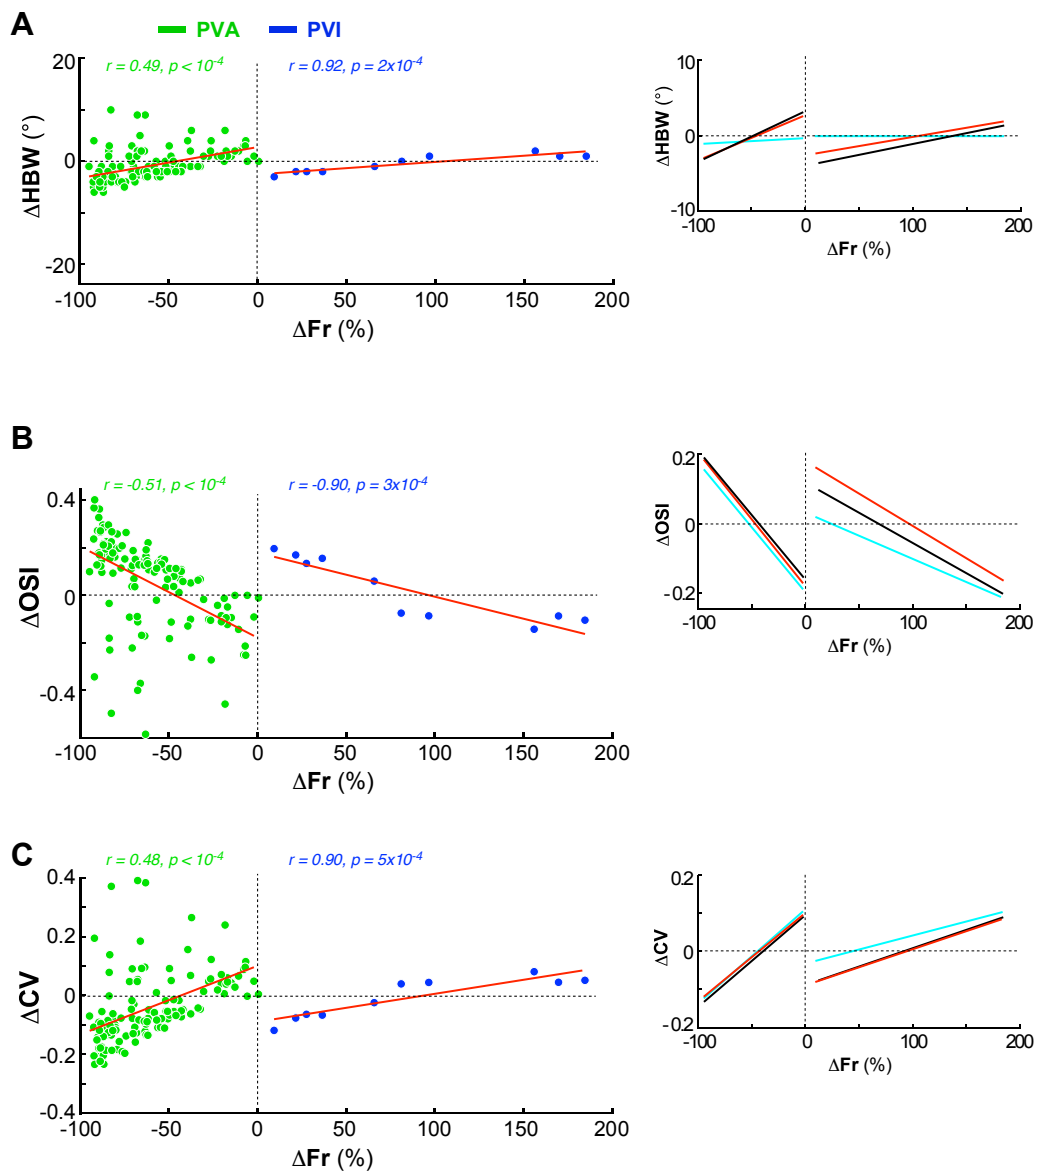

## Extended Data Figure 8

**I/O model-simulated changes in HBW, OSI and CV caused by  $PV^+$  neuron manipulation on the Unclassified cell population.**

(A) Scatter plot of the change in HBW as a function of the percent change in firing rate for I/O model-simulated effects of  $PV^+$  neuron manipulations on the Unclassified population. Here and in all remaining panels, the *red line* is the linear regression fit to the simulated data, to which the *r* and *p* values refer. *Right inset*: comparison of linear regression fits to the data (*black line*), the TLM-simulated data (*cyan line*) and the I/O model-simulated data (*red line*). (B) Same as in (A) but for changes in OSI. (C) Same as in (A) but for changes in CV. Other conventions are as in **Figs. 2-3**.
