# Supplementary material for: Laminar-specific control of response gain and orientation-tuning by parvalbumin-expressing inhibitory interneurons in primate visual cortex
Source: Research Square preprint supplement (doi:10.21203/rs.3.rs-9117440/v1), 2026-04-10
Supplement: Supplementary file 4 [file 6ff423bb8f090072faeb0296.pdf]

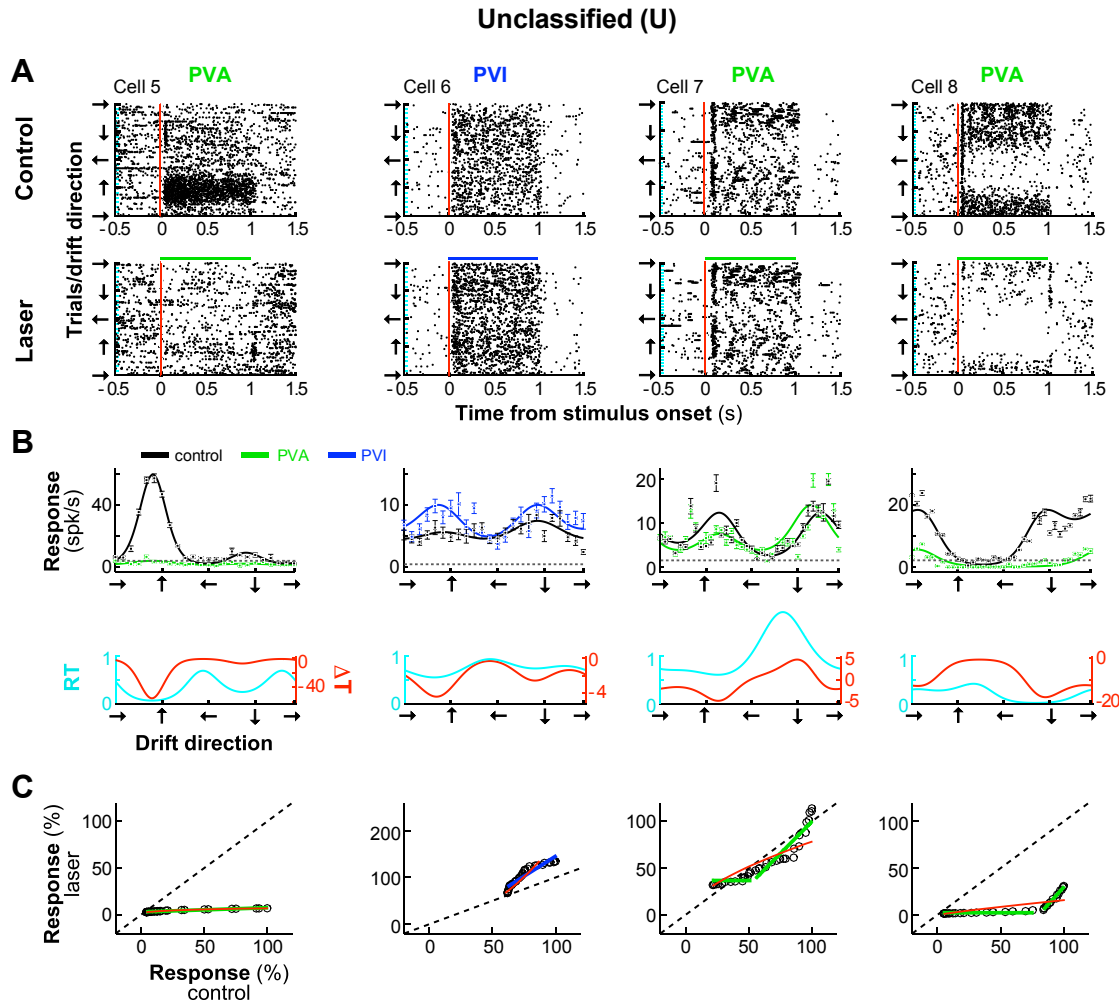

**Extended Data Figure 3**

**Unclassified units.**

Four example unclassified units. **(A)** Each column shows raster plots for an example Pyr unit in control (Top) and laser (PVA or PVI; Bottom) conditions. *Green and blue bars* at the top of the bottom rasters: time of laser photostimulation which was simultaneous with visual stimulus presentation (1s). Other conventions as in Fig. 1B. **(B)** Top: orientation tuning curves in control (*black*) and laser (PVA, *green*; PVI, *blue*) condition, fitted with a von-Mises function. Error bars: s.e.m. Bottom:  $\Delta T$  curve (*red*) and  $RT$  curve (*cyan*) for each respective cell. **(C)** Relative spiking response (% of max response in control condition) of the same units to stimuli of different drift directions in control vs laser conditions. *Green and blue lines*: threshold linear model fits. *Red line*: fits of our model described in Figs. 7-8.
