# Supplementary material for: Laminar-specific control of response gain and orientation-tuning by parvalbumin-expressing inhibitory interneurons in primate visual cortex
Source: Research Square preprint supplement (doi:10.21203/rs.3.rs-9117440/v1), 2026-04-10
Supplement: Supplementary file 5 [file 8d05f2ff0df281f8c5d871db.pdf]

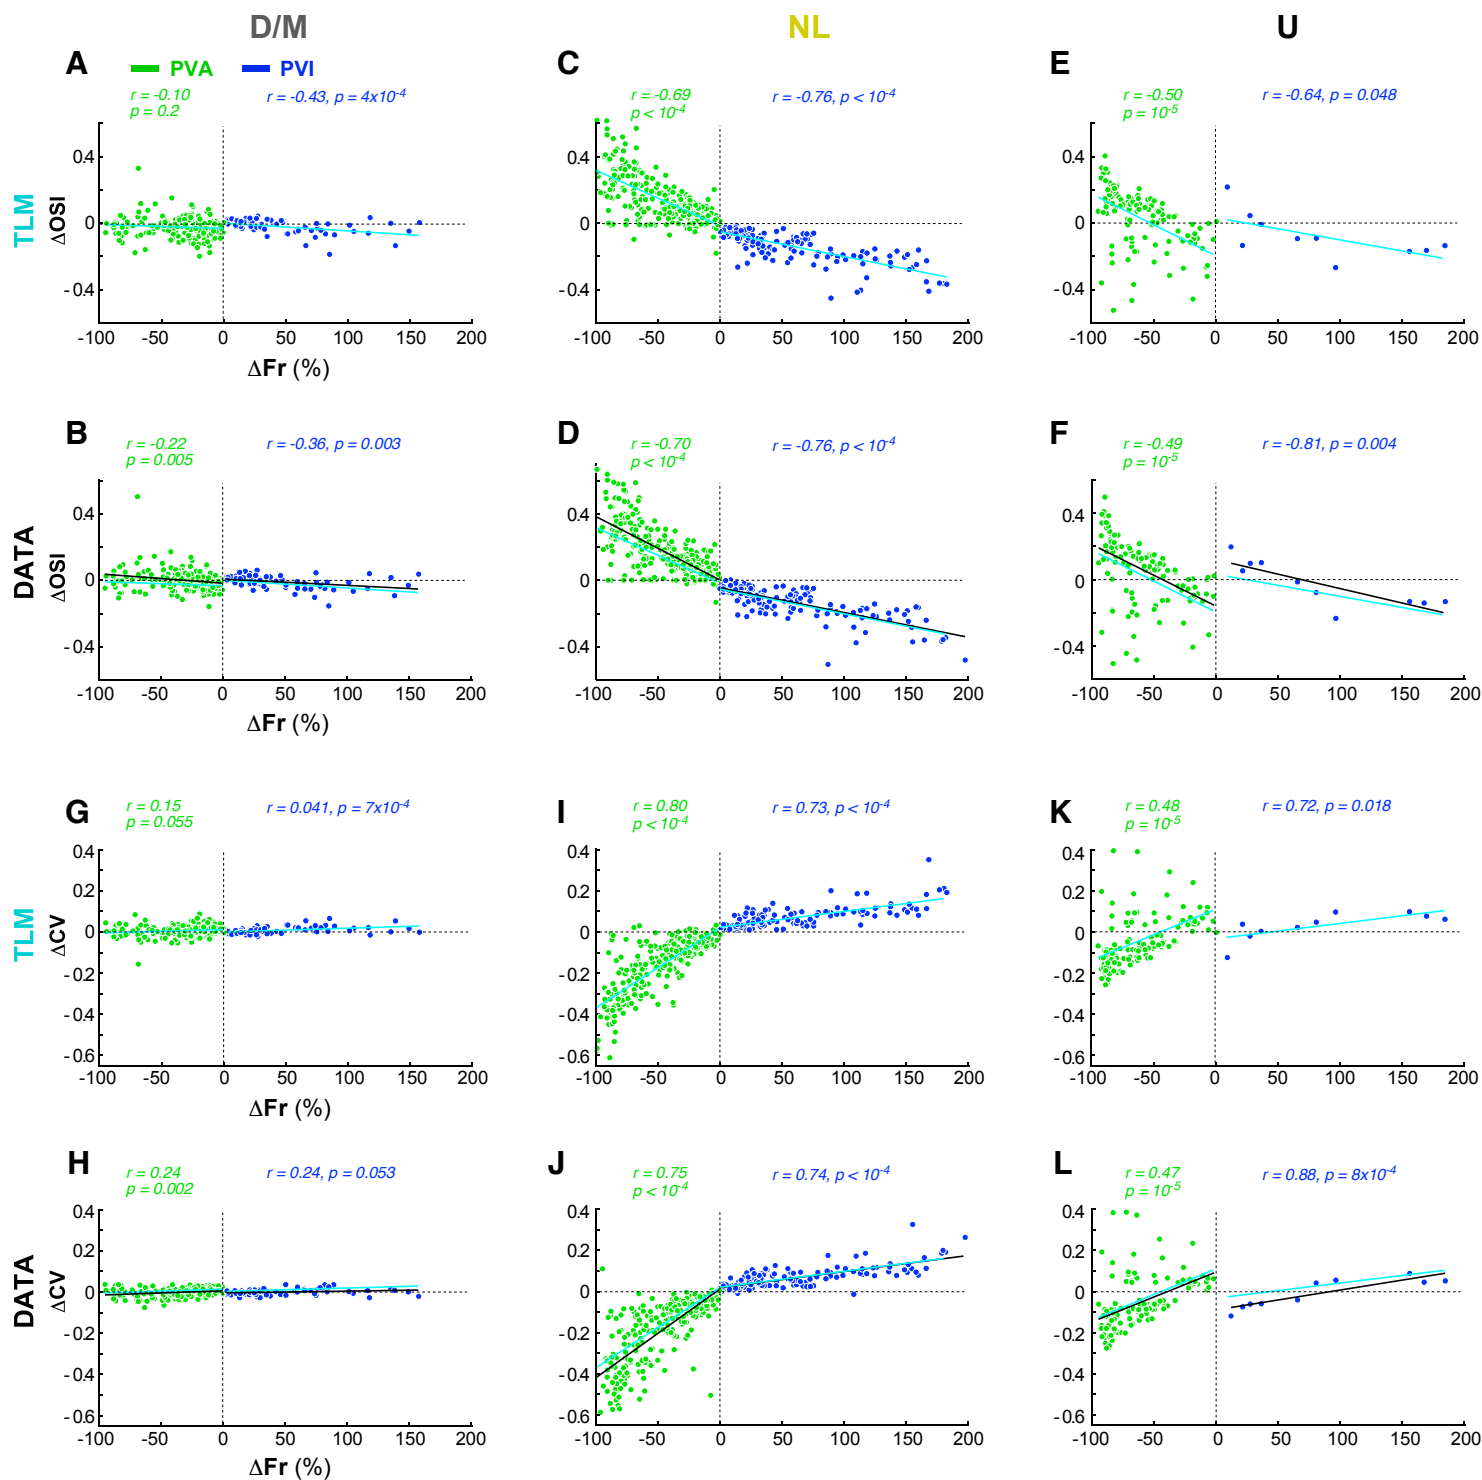

**Extended Data Figure 7**

**TLM-simulated changes in OSI and CV caused by  $PV^+$  neuron manipulation.**

(A) Scatter plot of the change in OSI as a function of the percent change in firing rate for TLM-simulated effects of  $PV^+$  neuron manipulations on the D/M population. Here in all remaining panels, the cyan line is the linear regression fit to the TLM-simulated data. The  $r$  and  $p$  values here and in panels (C,E,G,I,K) refer to the linear regression fit to the TLM-simulated data. (B) Same as in (A) but for the D/M population in the real data (same plot as shown in Fig. 3A). The black line, here and in (D,F,H,J,L) is the linear regression fit to the real data, to which the  $r$  and  $p$  values refer. (C,D) Same as (A,B) but for the NL population. Panel (D) shows the same plot as in Fig. 3C. (E,F) Same as in (A,B) but for the Unclassified (U) population. Other conventions are as in Fig. 3A,C. (G,H) Same as in (A,B) but here for the D/M population, we show the TLM-simulated (G) and real (H) changes in CV as a function of change in firing rate. Panel (H) shows the same plot as in Fig. 3E. (I,J) Same as in (G,H) for the NL population. Panel (J) shows the same plot as in Fig. 3G. (K,L) Same as in (G,H) but for the U population.
