# Supplementary material for: Laminar-specific control of response gain and orientation-tuning by parvalbumin-expressing inhibitory interneurons in primate visual cortex
Source: Research Square preprint supplement (doi:10.21203/rs.3.rs-9117440/v1), 2026-04-10
Supplement: Supplementary file 6 [file 95f1320ff4fc7fe36c9ebff8.pdf]

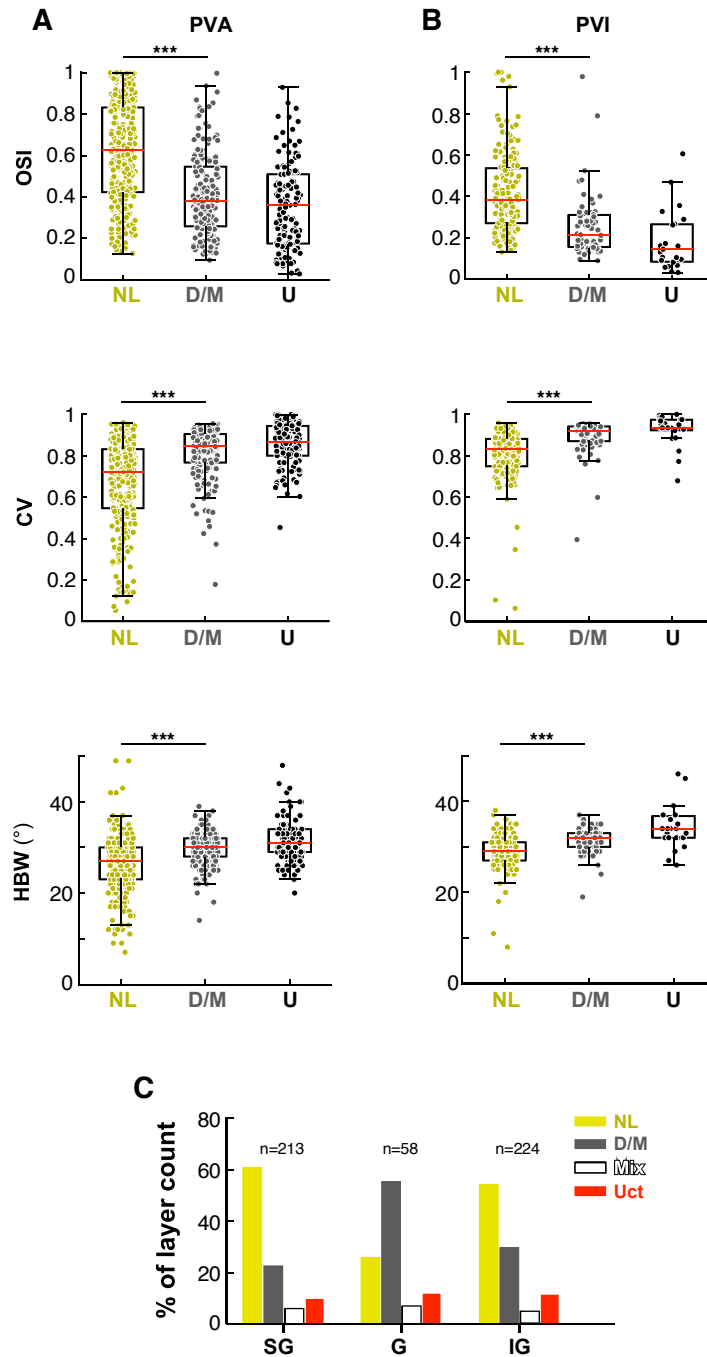

**Extended Data Figure 5**

**Tuning properties and laminar distribution of cells grouped by effect type.**

**(A)** Box plots of OSI (Top), CV (Middle) and HBW (Bottom) for NL (yellow dots), D/M (gray dots) and U (black dots) Pyr neurons recorded in the control (no laser) condition in PVA experiments. Red horizontal lines: median. **(B)** Same as in (A) but for units recorded in the control condition in PVI experiments. **(C)** Percent distribution of NL, D/M, and U (divided in Mix and Uct) units in different layers. n= total number of units in each layer.
